# Supplementary material
Source: MDPI journal article supplement (https://www.mdpi.com/1424-8247/14/3/185)
Supplement: s1 [file s1]

**Table S1. Demographic and clinical information and outcome of patients**

| Isolates | Hospital | Site   | Sample type | Sex | APACH E II | Admission | Initial ward | Service  | Discharge status | Comorbidities       |
|----------|----------|--------|-------------|-----|------------|-----------|--------------|----------|------------------|---------------------|
| SK001    | PSU      | Sputum | CS          | M   | 17         | Emergency | ICU          | Medicine | Survived         | DM, HTN, DLD        |
| SK002    | Songkhla | Sputum | C           | M   | 17         | Elective  | General      | Medicine | Survived         |                     |
| SK003    | Hatyai   | NP     | C           | M   | 13         | Emergency | ICU          | Surgery  | Survived         |                     |
| SK004    | Hatyai   | Sputum | C           | M   | 12         | Emergency | ICU          | Medicine | Survived         | DM, CVA             |
| SK005    | PSU      | NG     | C           | F   | 21         | Emergency | General      | Medicine | Dead             | DM                  |
| SK006    | PSU      | Sputum | C           | F   | 25         | Emergency | ICU          | Surgery  | Survived         | DM                  |
| SK009    | Hatyai   | Blood  | CS          | F   | 22         | Elective  | General      | Surgery  | Dead             |                     |
| SK010    | Hatyai   | Sputum | C           | M   | 23         | Emergency | ICU          | Surgery  | Dead             | DM                  |
| SK011    | PSU      | Rectum | C           | M   | 21         | Emergency | ICU          | Surgery  | Dead             | DM                  |
| SK012    | PSU      | Sputum | C           | F   | 20         | Emergency | ICU          | Surgery  | Survived         |                     |
| SK013    | PSU      | Sputum | C           | M   | 18         | Emergency | ICU          | Surgery  | Survived         | HTN, CKD, CAD, COPD |
| SK014    | Hatyai   | Skin   | C           | M   | 13         | Emergency | ICU          | Surgery  | Dead             |                     |
| SK015    | PSU      | Sputum | C           | M   | 15         | Emergency | General      | Medicine | Dead             | DM, DLD             |
| SK016    | PSU      | Sputum | CS          | F   | 17         | Emergency | General      | Medicine | Survived         | DM                  |
| SK022    | Songkhla | Sputum | C           | M   | 17         | Emergency | General      | Medicine | Survived         | HIV                 |
| SK023    | Songkhla | Sputum | C           | M   | 15         | Emergency | General      | Medicine | Dead             | DM                  |
| SK024    | PSU      | Skin   | C           | M   | 15         | Emergency | ICU          | Surgery  | Survived         | DM                  |
| SK025    | Hatyai   | NP     | C           | M   | 17         | Emergency | ICU          | Medicine | Survived         | DM                  |
| SK028    | Hatyai   | NG     | C           | F   | 20         | Emergency | General      | Medicine | Dead             | DM, CKD             |
| SK031    | Songkhla | Sputum | C           | M   | 23         | Emergency | ICU          | Medicine | Survived         | HTN, COPD           |
| SK032    | PSU      | Blood  | CS          | F   | 27         | Emergency | ICU          | Surgery  | Survived         | CAD                 |
| SK033    | PSU      | Urine  | CS          | F   | 21         | Emergency | ICU          | Medicine | Survived         | DM, CVA             |
| SK034    | Songkhla | Sputum | C           | F   | 20         | Emergency | ICU          | Medicine | Dead             | DM                  |
| SK035    | Songkhla | Sputum | C           | F   | 18         | Elective  | General      | Medicine | Dead             | DM                  |
| SK036    | Hatyai   | NG     | C           | M   | 17         | Emergency | ICU          | Medicine | Dead             |                     |
| SK037    | Songkhla | Sputum | C           | M   | 17         | Emergency | ICU          | Medicine | Survived         |                     |
| SK038    | Songkhla | Sputum | C           | M   | 23         | Elective  | General      | Medicine | Survived         | DM                  |
| SK039    | Hatyai   | Skin   | C           | M   | 21         | Emergency | ICU          | Medicine | Survived         | DM, HTN, CKD, CAD   |
| SK040    | Hatyai   | Sputum | CS          | F   | 22         | Emergency | ICU          | Medicine | Dead             | DM, DLD, COPD       |
| SK041    | Hatyai   | Sputum | C           | M   | 23         | Emergency | ICU          | Surgery  | Dead             |                     |
| SK042    | Songkhla | NP     | C           | M   | 21         | Emergency | ICU          | Medicine | Survived         | DM                  |
| SK043    | Songkhla | Sputum | C           | M   | 20         | Emergency | General      | Medicine | Survived         |                     |
| SK044    | Hatyai   | Sputum | C           | F   | 15         | Emergency | ICU          | Medicine | Survived         |                     |
| SK045    | Hatyai   | NG     | C           | M   | 15         | Emergency | ICU          | Surgery  | Dead             | DM                  |
| SK049    | PSU      | Sputum | C           | M   | 17         | Emergency | ICU          | Surgery  | Survived         | DM                  |
| SK050    | PSU      | Sputum | C           | M   | 10         | Elective  | General      | Surgery  | Survived         | DM, HTN, CKD, CVA,  |
| SK052    | PSU      | Skin   | C           | M   | 8          | Emergency | ICU          | Surgery  | Dead             | DLD                 |
| SK053    | PSU      | Sputum | CS          | M   | 17         | Emergency | ICU          | Surgery  | Survived         | HIV                 |
| SK054    | PSU      | Sputum | C           | M   | 12         | Emergency | ICU          | Medicine | Dead             | COPD                |
| SK055    | Hatyai   | Sputum | C           | F   | 17         | Emergency | General      | Medicine | Dead             | DM                  |
| SK056    | Hatyai   | Skin   | C           | M   | 15         | Emergency | ICU          | Surgery  | Dead             | DM, CAD             |
| SK057    | Songkhla | Sputum | C           | M   | 15         | Emergency | ICU          | Medicine | Dead             | DM                  |
| SK058    | PSU      | Sputum | C           | M   | 21         | Emergency | ICU          | Medicine | Survived         |                     |
| SK059    | PSU      | NP     | C           | F   | 20         | Elective  | General      | Surgery  | Survived         | HTN                 |
| SK060    | Songkhla | Sputum | C           | F   | 22         | Emergency | ICU          | Surgery  | Survived         | DM                  |
| SK061    | Hatyai   | Wound  | CS          | F   | 23         | Emergency | ICU          | Surgery  | Dead             | DM, DLD, CKD, CVA   |
| SK062    | Hatyai   | Sputum | CS          | F   | 21         | Emergency | General      | Surgery  | Survived         | DM, COPD            |
| SK063    | PSU      | Sputum | C           | M   | 20         | Emergency | ICU          | Medicine | Dead             |                     |
| SK064    | PSU      | Sputum | CS          | M   | 21         | Elective  | general      | Medicine | Dead             |                     |
| SK065    | Hatyai   | Sputum | C           | M   | 18         | Emergency | ICU          | Medicine | Survived         |                     |
| SK066    | Songkhla | Skin   | C           | M   | 23         | Emergency | ICU          | Surgery  | Survived         | DM                  |
| SK067    | Hatyai   | Sputum | C           | F   | 27         | Emergency | General      | Surgery  | Survived         | DLD, CKD            |
| SK068    | PSU      | Blood  | CS          | M   | 21         | Emergency | ICU          | Surgery  | Dead             | HTN, HIV            |
| SK069    | PSU      | Sputum | CS          | M   | 20         | Emergency | ICU          | Surgery  | Survived         | DM, CVA, CAD        |
| SK070    | Songkhla | Sputum | C           | F   | 18         | Elective  | General      | Medicine | Survived         |                     |
| SK075    | PSU      | Sputum | CS          | M   | 17         | Emergency | ICU          | Medicine | Survived         | COPD                |
| SK077    | Hatyai   | Sputum | C           | M   | 17         | Emergency | ICU          | Medicine | Dead             | DM                  |
| SK078    | Songkhla | Sputum | CS          | F   | 23         | Emergency | ICU          | Surgery  | Dead             |                     |
| SK079    | Hatyai   | Sputum | C           | M   | 21         | Emergency | ICU          | Medicine | Survived         |                     |

|        |            |        |    |   |    |           |         |          |          |                        |
|--------|------------|--------|----|---|----|-----------|---------|----------|----------|------------------------|
| ST002  | Satoon     | Sputum | C  | M | 23 | Emergency | ICU     | Medicine | Survived | DM                     |
| ST004  | Satoon     | Blood  | CS | M | 21 | Elective  | General | Medicine | Survived | DLD                    |
| ST005  | Pattalung  | Sputum | CS | F | 20 | Emergency | ICU     | Medicine | Dead     | HTN                    |
| ST006  | Satoon     | Sputum | C  | M | 21 | Emergency | ICU     | Surgery  | Survived | CKD                    |
| ST009  | Satoon     | Sputum | CS | M | 13 | Emergency | ICU     | Medicine | Survived | DM, CAD                |
| ST010  | Pattalung  | Blood  | CS | M | 25 | Emergency | General | Medicine | Survived |                        |
| ST011  | Pattalung  | Sputum | CS | M | 13 | Emergency | General | Medicine | Dead     | DLD, COPD, HIV         |
| ST012  | Pattalung  | Sputum | C  | F | 21 | Emergency | ICU     | Medicine | Survived | DM                     |
| ST013  | Satoon     | Skin   | C  | F | 22 | Emergency | ICU     | Surgery  | Survived |                        |
| ST016  | Satoon     | Sputum | C  | F | 18 | Emergency | ICU     | Surgery  | Survived |                        |
| ST017  | Satoon     | Sputum | CS | M | 17 | Elective  | General | Surgery  | Dead     | DM                     |
| ST018  | Pattalung  | Sputum | CS | M | 18 | Emergency | ICU     | Surgery  | Survived |                        |
| ST021  | Satoon     | Urine  | CS | M | 21 | Emergency | ICU     | Medicine | Survived | HTN, DLD, CAD          |
| ST023  | Satoon     | Sputum | C  | M | 27 | Emergency | General | Medicine | Survived | DM, CKD                |
| ST024  | Pattalung  | NP     | C  | F | 23 | Emergency | ICU     | Medicine | Dead     | DLD, CKD               |
| ST026  | Satoon     | Sputum | CS | M | 22 | Emergency | ICU     | Surgery  | Survived |                        |
| ST027  | Satoon     | Wound  | CS | M | 20 | Elective  | General | Medicine | Survived | COPD                   |
| TR0001 | Trang      | Sputum | C  | F | 21 | Emergency | General | Surgery  | Survived | DM, CVA                |
| TR0005 | Trang      | Sputum | CS | M | 18 | Emergency | General | Medicine | Survived |                        |
| TR0006 | Pattani    | Sputum | C  | M | 17 | Emergency | ICU     | Medicine | Dead     | HIV                    |
| TR0007 | Trang      | NG     | C  | M | 15 | Emergency | ICU     | Medicine | Survived |                        |
| TR0009 | Yala       | Sputum | CS | F | 18 | Emergency | ICU     | Surgery  | Survived | DM                     |
| TR0010 | Pattani    | Sputum | C  | F | 18 | Emergency | ICU     | Medicine | Survived | HTN, DLD, CKD          |
| TR0011 | Trang      | Sputum | CS | F | 14 | Emergency | ICU     | Medicine | Dead     |                        |
| TR0013 | Yala       | Blood  | CS | F | 12 | Emergency | ICU     | Medicine | Survived | HTN                    |
| TR0014 | Trang      | Sputum | CS | M | 21 | Emergency | General | Surgery  | Dead     | DM, HTN, DLD, CAD      |
| TR0015 | Pattani    | Sputum | C  | M | 25 | Elective  | General | Medicine | Dead     | COPD                   |
| TR0017 | Trang      | Wound  | CS | M | 22 | Emergency | General | Medicine | Survived |                        |
| TR0019 | Yala       | Sputum | C  | F | 24 | Emergency | General | Medicine | Survived | HTN                    |
| TR0020 | Yala       | NP     | C  | M | 21 | Emergency | ICU     | Surgery  | Survived | DM, HTN, DLD, CKD, HIV |
| TR0021 | Narathiwas | Sputum | C  | F | 20 | Emergency | ICU     | Medicine | Survived | HTN, CVA               |
| TR0022 | Trang      | Sputum | CS | F | 18 | Emergency | ICU     | Medicine | Dead     |                        |
| TR0023 | Pattani    | Sputum | CS | M | 14 | Emergency | ICU     | Medicine | Survived | DM, CAD                |
| TR0025 | Trang      | Sputum | C  | M | 15 | Elective  | General | Surgery  | Dead     |                        |
| TR0026 | Trang      | Blood  | CS | M | 18 | Emergency | ICU     | Surgery  | Dead     | HTN                    |
| TR0027 | Yala       | Sputum | C  | F | 18 | Emergency | ICU     | Surgery  | Dead     |                        |
| TR0028 | Narathiwas | Sputum | CS | M | 15 | Emergency | ICU     | Medicine | Dead     | DM, DLD, COPD          |
| TR0029 | Trang      | Sputum | C  | M | 15 | Emergency | ICU     | Surgery  | Dead     | HTN                    |
| TR0030 | Pattani    | Sputum | CS | M | 18 | Emergency | ICU     | Surgery  | Dead     |                        |
| TR0031 | Trang      | Sputum | CS | F | 20 | Emergency | ICU     | Surgery  | Dead     |                        |
| TR0032 | Yala       | Sputum | C  | M | 24 | Emergency | ICU     | Medicine | Survived | DM, CKD, CAD           |
| TR0033 | Trang      | Sputum | CS | M | 28 | Emergency | ICU     | Medicine | Survived | HTN, HIV               |
| TR0034 | Yala       | Urine  | CS | M | 21 | Emergency | General | Medicine | Survived |                        |
| TR0035 | Trang      | Sputum | CS | M | 20 | Elective  | General | Medicine | Dead     |                        |
| TR0036 | Pattani    | Sputum | C  | F | 18 | Emergency | General | Surgery  | Survived | DM                     |
| TR0037 | Trang      | Sputum | C  | M | 18 | Emergency | ICU     | Surgery  | Survived | HTN, DLD, CKD          |
| TR0038 | Trang      | Skin   | C  | M | 18 | Emergency | ICU     | Surgery  | Dead     | HTN                    |
| TR0039 | Yala       | Sputum | CS | M | 24 | Emergency | ICU     | Medicine | Survived | DM, COPD               |
| TR0040 | Yala       | Blood  | CS | F | 21 | Emergency | ICU     | Surgery  | Survived |                        |
| TR0041 | Trang      | Sputum | CS | M | 22 | Emergency | ICU     | Surgery  | Dead     |                        |
| TR0042 | Narathiwas | Sputum | C  | M | 24 | Elective  | General | Medicine | Survived | DM, HTN, CAD           |
| TR0043 | Trang      | Sputum | CS | M | 21 | Emergency | ICU     | Surgery  | Survived | HTN, CVA               |
| TR0044 | Trang      | Blood  | CS | M | 20 | Emergency | ICU     | Surgery  | Survived |                        |
| TR0045 | Pattani    | Sputum | CS | M | 15 | Emergency | ICU     | Medicine | Dead     |                        |
| TR0046 | Trang      | Sputum | CS | F | 15 | Emergency | ICU     | Medicine | Dead     | HIV                    |
| TR0047 | Yala       | Wound  | CS | M | 18 | Emergency | ICU     | Surgery  | Survived | DM, HTN, DLD           |
| TR0048 | Trang      | Sputum | CS | M | 10 | Emergency | ICU     | Medicine | Dead     |                        |
| TR0049 | Narathiwas | Sputum | C  | M | 8  | Emergency | General | Medicine | Survived | CKD, COPD              |
| TR0050 | Narathiwas | NP     | C  | F | 18 | Elective  | General | Medicine | Survived |                        |
| TR0051 | Trang      | Sputum | C  | M | 12 | Emergency | ICU     | Medicine | Dead     | DM, HTN                |
| TR0052 | Yala       | Wound  | CS | M | 18 | Emergency | ICU     | Surgery  | Dead     |                        |
| TR0053 | Trang      | Sputum | CS | M | 15 | Emergency | ICU     | Medicine | Survived | DM, HTN, CAD           |
| TR0054 | Trang      | Sputum | CS | M | 15 | Emergency | ICU     | Medicine | Survived | DM                     |

|        |            |        |    |   |    |           |         |          |          |                |
|--------|------------|--------|----|---|----|-----------|---------|----------|----------|----------------|
| TR0055 | Pattani    | Sputum | C  | F | 21 | Emergency | General | Medicine | Survived | DM, HTN, DLD   |
| TR0056 | Trang      | NP     | C  | M | 20 | Emergency | ICU     | Surgery  | Dead     |                |
| TR0057 | Narathiwas | NP     | C  | M | 22 | Emergency | ICU     | Medicine | Survived |                |
| TR0058 | Trang      | Sputum | C  | M | 24 | Emergency | ICU     | Medicine | Survived | CKD            |
| TR0059 | Yala       | Blood  | CS | M | 21 | Elective  | General | Medicine | Dead     | HTN, DLD, COPD |
| TR0060 | Trang      | Sputum | CS | F | 20 | Emergency | ICU     | Surgery  | Survived | DM             |
| TR0061 | Yala       | Sputum | C  | M | 21 | Emergency | ICU     | Surgery  | Survived | HTN            |
| TR0062 | Trang      | Skin   | C  | M | 18 | Emergency | ICU     | Medicine | Dead     | HTN            |
| TR0063 | Narathiwas | Sputum | CS | M | 24 | Emergency | ICU     | Medicine | Survived | CAD            |
| TR0064 | Trang      | Urine  | CS | F | 28 | Emergency | ICU     | Medicine | Survived | DM             |
| TR0065 | Trang      | Sputum | C  | F | 21 | Emergency | General | Medicine | Dead     | CVA            |
| TR0067 | Pattani    | Sputum | CS | M | 20 | Emergency | ICU     | Surgery  | Survived | HTN, DLD       |
| TR0068 | Trang      | Sputum | C  | M | 18 | Emergency | ICU     | Medicine | Survived |                |
| TR0069 | Narathiwas | Sputum | CS | M | 18 | Emergency | ICU     | Medicine | Survived | CKD            |
| TR0070 | Yala       | Wound  | CS | F | 18 | Elective  | General | Medicine | Survived | DM, HTN, HIV   |
| TR0071 | Trang      | Sputum | CS | M | 24 | Emergency | ICU     | Surgery  | Dead     | HTN            |
| TR0073 | Trang      | Sputum | CS | M | 21 | Emergency | ICU     | Surgery  | Dead     | HTN, DLD, CAD  |
| TR0074 | Yala       | Sputum | C  | M | 24 | Emergency | ICU     | Medicine | Dead     |                |
| TR0082 | Trang      | Wound  | CS | M | 21 | Emergency | ICU     | Surgery  | Dead     | CAD            |
| TR0084 | Pattani    | Sputum | CS | F | 20 | Emergency | ICU     | Medicine | Dead     |                |
| TR0085 | Pattani    | Sputum | C  | M | 21 | Emergency | ICU     | Surgery  | Survived | DM             |
| TR0086 | Yala       | Sputum | C  | M | 14 | Emergency | ICU     | Surgery  | Survived |                |
| TR0087 | Pattani    | Sputum | CS | M | 25 | Emergency | ICU     | Surgery  | Survived | CKD, CVA       |
| TR0088 | Trang      | Skin   | C  | F | 14 | Emergency | ICU     | Medicine | Dead     |                |
| TR0089 | Trang      | NP     | C  | F | 21 | Emergency | ICU     | Medicine | Survived |                |
| TR0090 | Yala       | Sputum | C  | F | 22 | Elective  | General | Medicine | Survived |                |
| TR0091 | Yala       | NG     | C  | F | 18 | Emergency | ICU     | Surgery  | Survived |                |
| TR0092 | Trang      | Blood  | CS | F | 18 | Emergency | ICU     | Surgery  | Dead     | DM             |
| TR0093 | Narathiwas | Sputum | C  | F | 18 | Emergency | ICU     | Surgery  | Survived |                |
| TR0094 | Trang      | Sputum | CS | F | 21 | Emergency | ICU     | Surgery  | Survived |                |
| TR0095 | Pattani    | Sputum | C  | M | 28 | Emergency | ICU     | Medicine | Survived | DM             |
| TR0096 | Pattani    | Sputum | CS | M | 24 | Emergency | ICU     | Medicine | Dead     | HTN            |
| TR0097 | Yala       | Sputum | C  | F | 22 | Emergency | ICU     | Surgery  | Survived |                |
| TR0098 | Pattani    | Sputum | C  | M | 20 | Emergency | ICU     | Medicine | Survived | CKD, COPD      |
| TR099  | Pattani    | Blood  | CS | M | 21 | Emergency | ICU     | Medicine | Survived | DM             |
| TR100  | Yala       | Sputum | C  | F | 18 | Elective  | General | Surgery  | Dead     | DLD            |
| TR0101 | Pattani    | Sputum | C  | M | 18 | Emergency | ICU     | Medicine | Dead     |                |
| TR0102 | Trang      | Sputum | C  | M | 15 | Emergency | ICU     | Medicine | Dead     |                |
| TR0103 | Trang      | Sputum | CS | M | 17 | Emergency | ICU     | Medicine | Dead     | DLD, CAD       |
| TR0104 | Yala       | Sputum | C  | M | 17 | Emergency | ICU     | Medicine | Survived | DM, HIV        |
| TR0105 | Trang      | Sputum | CS | F | 13 | Emergency | ICU     | Surgery  | Survived |                |
| TR0106 | Trang      | Urine  | CS | M | 12 | Emergency | ICU     | Medicine | Survived | HTN            |
| TR0107 | Pattani    | Sputum | C  | M | 21 | Emergency | ICU     | Medicine | Survived | CKD            |
| TR0108 | Trang      | Skin   | C  | M | 25 | Emergency | ICU     | Surgery  | Dead     | DLD            |
| TR0109 | Yala       | Sputum | C  | F | 22 | Elective  | General | Medicine | Dead     |                |
| TR0110 | Trang      | Sputum | CS | M | 23 | Emergency | ICU     | Medicine | Survived | DLD            |
| TR0111 | Trang      | Skin   | C  | M | 21 | Emergency | ICU     | Medicine | Dead     | DM, CVA        |
| TR0112 | Yala       | NP     | C  | M | 20 | Emergency | ICU     | Medicine | Survived |                |
| TR0113 | Trang      | Sputum | C  | M | 18 | Emergency | ICU     | Surgery  | Survived |                |
| TR0114 | Trang      | Sputum | CS | M | 13 | Emergency | ICU     | Medicine | Survived |                |
| TR0115 | Pattani    | Sputum | C  | F | 15 | Emergency | ICU     | Medicine | Dead     | DM, CKD, CAD   |
| TR0116 | Trang      | NP     | C  | F | 17 | Emergency | ICU     | Medicine | Survived | DM, HTN        |
| TR0117 | Narathiwas | Sputum | C  | F | 17 | Emergency | General | Medicine | Dead     | DLD            |
| TR0118 | Trang      | Sputum | CS | F | 15 | Elective  | General | Surgery  | Survived |                |
| TR0119 | Yala       | Sputum | C  | M | 15 | Emergency | General | Surgery  | Survived |                |
| TR0120 | Trang      | NP     | C  | M | 17 | Emergency | ICU     | Surgery  | Dead     | CAD            |
| TR0121 | Trang      | NG     | C  | F | 20 | Emergency | ICU     | Medicine | Dead     |                |
| TR0122 | Trang      | Blood  | CS | M | 23 | Emergency | ICU     | Medicine | Survived | DM             |
| TR0123 | Yala       | Skin   | C  | F | 27 | Emergency | ICU     | Medicine | Survived | CKD            |
| TR0124 | Trang      | NG     | C  | F | 21 | Emergency | ICU     | Medicine | Survived |                |
| TR0125 | Pattani    | NP     | C  | M | 20 | Emergency | General | Surgery  | Dead     |                |
| TR0126 | Trang      | Sputum | CS | M | 18 | Emergency | ICU     | Surgery  | Survived | HTN, COPD      |
| TR0127 | Yala       | Sputum | C  | M | 17 | Emergency | ICU     | Medicine | Survived | DLD            |

|        |            |        |    |   |    |           |         |          |          |          |
|--------|------------|--------|----|---|----|-----------|---------|----------|----------|----------|
| TR0128 | Trang      | Skin   | C  | F | 17 | Emergency | ICU     | Surgery  | Survived |          |
| TR0129 | Pattani    | Sputum | C  | M | 23 | Elective  | General | Medicine | Survived | DM       |
| TR0130 | Narathiwas | Sputum | CS | F | 21 | Emergency | ICU     | Medicine | Survived |          |
| TR0131 | Pattani    | Sputum | C  | M | 22 | Emergency | ICU     | Surgery  | Dead     | CVA      |
| TR0132 | Trang      | NG     | C  | M | 23 | Emergency | ICU     | Medicine | Dead     | CKD, CAD |
| TR0133 | Yala       | NP     | C  | F | 21 | Emergency | ICU     | Medicine | Survived |          |
| TR0134 | Trang      | Sputum | CS | F | 20 | Emergency | ICU     | Surgery  | Dead     | DM       |
| TR0135 | Narathiwas | Sputum | C  | M | 15 | Emergency | ICU     | Surgery  | Survived | HTN      |

Site: NG; nasogastric tube, NP; nasopharyngeal swab, Sample type: CS; clinical specimen, C; colonization,

Comorbidities: DM; diabetes mellitus, HTN; essential blood hypertension, DLD; dyslipidaemia, CKD; chronic kidney disease, CVA; cerebrovascular disease, CAD; coronary heart disease, COPD; chronic obstructive pulmonary disease, HIV; human immunodeficiency viral infection, ICU; intensive care unit.

**Table S2. Antibacterial effects of carbapenem (imipenem and meropenem) and minimum inhibitory concentrations of fosfomycin on clinical *Acinetobacter baumannii* isolates**

| S/N | Isolates code | Zone of inhibition (mm) |           | MIC Fosfomycin (µg/mL) |     |
|-----|---------------|-------------------------|-----------|------------------------|-----|
|     |               | Imipenem                | Meropenem |                        |     |
| 1   | SK001         | R                       | R         | 512                    | 512 |
| 2   | SK002         | R                       | R         | 256                    | 256 |
| 3   | SK003         | S (27.60)               | I (17.80) | 128                    | 128 |
| 4   | SK004         | S (27.60)               | S (18.70) | 128                    | 128 |
| 5   | SK005         | R                       | R         | 128                    | 128 |
| 6   | SK006         | R                       | R         | 256                    | 256 |
| 7   | SK009         | R                       | R         | 256                    | 256 |
| 8   | SK010         | R                       | R         | 256                    | 256 |
| 9   | SK011         | R                       | R         | 256                    | 256 |
| 10  | SK012         | I (20.50)               | R         | 512                    | 512 |
| 11  | SK013         | R                       | R         | 256                    | 256 |
| 12  | SK014         | R                       | R         | 256                    | 256 |
| 13  | SK015         | R                       | R         | 128                    | 128 |
| 14  | SK016         | R                       | R         | 256                    | 256 |
| 15  | SK022         | R                       | R         | 256                    | 256 |
| 16  | SK023         | S (27.85)               | S (30.20) | 64                     | 64  |
| 17  | SK024         | R                       | R         | 128                    | 128 |
| 18  | SK025         | R                       | R         | 128                    | 128 |
| 19  | SK028         | R                       | R         | 256                    | 256 |
| 20  | SK031         | R                       | R         | 128                    | 128 |
| 21  | SK032         | R                       | R         | 256                    | 256 |
| 22  | SK033         | R                       | R         | 128                    | 128 |
| 23  | SK034         | R                       | R         | 128                    | 128 |
| 24  | SK035         | R                       | R         | 256                    | 256 |
| 25  | SK036         | S (26.85)               | R         | 256                    | 256 |
| 26  | SK037         | S (30.25)               | R         | 256                    | 128 |
| 27  | SK038         | R                       | R         | 256                    | 256 |
| 28  | SK039         | R                       | R         | 256                    | 128 |
| 29  | SK040         | R                       | R         | 256                    | 256 |
| 30  | SK041         | R                       | R         | 256                    | 256 |
| 31  | SK042         | R                       | R         | 256                    | 256 |
| 32  | SK043         | R                       | R         | 64                     | 64  |
| 33  | SK044         | R                       | R         | 256                    | 256 |
| 34  | SK045         | R                       | R         | 128                    | 128 |
| 35  | SK049         | R                       | R         | 256                    | 256 |
| 36  | SK050         | R                       | R         | 256                    | 256 |
| 37  | SK052         | R                       | R         | 128                    | 128 |
| 38  | SK053         | R                       | R         | 256                    | 256 |
| 39  | SK054         | R                       | R         | 256                    | 256 |

|    |        |           |           |       |       |
|----|--------|-----------|-----------|-------|-------|
| 40 | SK055  | R         | R         | 256   | 256   |
| 41 | SK056  | R         | R         | 256   | 256   |
| 42 | SK057  | R         | R         | 256   | 256   |
| 43 | SK058  | R         | R         | 256   | 128   |
| 44 | SK059  | R         | R         | 256   | 256   |
| 45 | SK060  | R         | R         | 256   | 256   |
| 46 | SK061  | R         | R         | 256   | 256   |
| 47 | SK062  | R         | R         | 256   | 256   |
| 48 | SK063  | R         | R         | 256   | 256   |
| 49 | SK064  | R         | R         | 256   | 128   |
| 50 | SK065  | R         | R         | 256   | 256   |
| 51 | SK066  | R         | R         | 256   | 128   |
| 52 | SK067  | R         | R         | 256   | 256   |
| 53 | SK068  | R         | R         | 256   | 256   |
| 54 | SK069  | R         | R         | 256   | 256   |
| 55 | SK070  | R         | R         | 256   | 256   |
| 56 | SK075  | R         | R         | 256   | 256   |
| 57 | SK077  | R         | R         | 128   | 128   |
| 58 | SK078  | R         | R         | 256   | 256   |
| 59 | SK079  | R         | R         | 128   | 128   |
| 60 | ST002  | R         | R         | 128   | 128   |
| 61 | ST004  | R         | R         | 64    | 64    |
| 62 | ST005  | R         | R         | 128   | 128   |
| 63 | ST006  | S (37.25) | S (46.35) | 32    | 32    |
| 64 | ST009  | R         | R         | 128   | 128   |
| 65 | ST010  | R         | R         | 64    | 128   |
| 66 | ST011  | R         | R         | 256   | 256   |
| 67 | ST012  | R         | R         | 256   | 128   |
| 68 | ST013  | R         | R         | 128   | 128   |
| 69 | ST016  | R         | R         | 128   | 128   |
| 70 | ST017  | R         | R         | 128   | 128   |
| 71 | ST018  | R         | R         | 128   | 128   |
| 72 | ST021  | R         | R         | 128   | 128   |
| 73 | ST023  | S (22.75) | S (29.10) | 2048  | 2048  |
| 74 | ST024  | R         | R         | 128   | 128   |
| 75 | ST026  | R         | R         | >2048 | >2048 |
| 76 | ST027  | R         | R         | 128   | 128   |
| 77 | TR0001 | S (26.50) | S (20.00) | 64    | 64    |
| 78 | TR0005 | R         | R         | 256   | 256   |
| 79 | TR0006 | R         | R         | 256   | 256   |
| 80 | TR0007 | R         | R         | 128   | 128   |
| 81 | TR0009 | R         | R         | 128   | 128   |
| 82 | TR0010 | R         | R         | 128   | 128   |
| 83 | TR0011 | R         | R         | 128   | 128   |
| 84 | TR0013 | R (11.60) | R (11.60) | 128   | 128   |
| 85 | TR0014 | R         | R         | 128   | 128   |

|     |        |           |           |     |     |
|-----|--------|-----------|-----------|-----|-----|
| 86  | TR0015 | R         | R         | 256 | 256 |
| 87  | TR0017 | R         | R         | 256 | 256 |
| 88  | TR0019 | R         | R         | 128 | 128 |
| 89  | TR0020 | R         | R         | 128 | 128 |
| 90  | TR0021 | R         | R         | 128 | 128 |
| 91  | TR0022 | R         | R         | 64  | 64  |
| 92  | TR0023 | R         | R         | 128 | 128 |
| 93  | TR0025 | R         | R         | 64  | 64  |
| 94  | TR0026 | R         | R         | 128 | 128 |
| 95  | TR0027 | R         | R         | 128 | 128 |
| 96  | TR0028 | R         | R         | 256 | 256 |
| 97  | TR0029 | R         | R         | 256 | 256 |
| 98  | TR0030 | S (25.80) | I (17.00) | ND  | ND  |
| 99  | TR0031 | S (25.50) | I (16.45) | ND  | ND  |
| 100 | TR0032 | R         | R         | 128 | 128 |
| 101 | TR0033 | R         | R         | 64  | 64  |
| 102 | TR0034 | R         | R         | 128 | 128 |
| 103 | TR0035 | R         | R         | 256 | 256 |
| 104 | TR0036 | R         | R         | 128 | 128 |
| 105 | TR0037 | R         | R         | 128 | 128 |
| 106 | TR0038 | R         | R         | 128 | 128 |
| 107 | TR0039 | R         | R         | 128 | 128 |
| 108 | TR0040 | R         | R         | 128 | 128 |
| 109 | TR0041 | R         | R         | 128 | 128 |
| 110 | TR0042 | R         | R         | 64  | 64  |
| 111 | TR0043 | R         | R         | 128 | 128 |
| 112 | TR0044 | R         | R         | 128 | 128 |
| 113 | TR0045 | R         | R         | 128 | 128 |
| 114 | TR0046 | R         | R         | 128 | 128 |
| 115 | TR0047 | R         | R         | 128 | 128 |
| 116 | TR0048 | R         | R         | 128 | 128 |
| 117 | TR0049 | R         | R         | 64  | 64  |
| 118 | TR0050 | R         | R         | 128 | 128 |
| 119 | TR0051 | R         | S (21.00) | 64  | 64  |
| 120 | TR0052 | R         | R         | 64  | 64  |
| 121 | TR0053 | R         | R         | 128 | 128 |
| 122 | TR0054 | R         | R         | 128 | 128 |
| 123 | TR0055 | R         | R         | 128 | 128 |
| 124 | TR0056 | R         | R         | 128 | 128 |
| 125 | TR0057 | R         | R         | 128 | 128 |
| 126 | TR0058 | R         | R         | 256 | 256 |
| 127 | TR0059 | R         | R         | 128 | 128 |
| 128 | TR0060 | R         | R         | 128 | 128 |
| 129 | TR0061 | R         | R         | 128 | 128 |
| 130 | TR0062 | R         | R         | 256 | 256 |
| 131 | TR0063 | R         | R         | 128 | 128 |

|     |        |           |           |     |     |
|-----|--------|-----------|-----------|-----|-----|
| 132 | TR0064 | R         | R         | 64  | 64  |
| 133 | TR0065 | R         | R         | 128 | 128 |
| 134 | TR0067 | R         | R         | 64  | 64  |
| 135 | TR0068 | R         | R         | 128 | 128 |
| 136 | TR0069 | R         | R         | 128 | 128 |
| 137 | TR0070 | R         | R         | 128 | 128 |
| 138 | TR0071 | R         | R         | 64  | 64  |
| 139 | TR0073 | R         | R         | 128 | 128 |
| 140 | TR0074 | R         | R         | 128 | 128 |
| 141 | TR0082 | R         | R         | 128 | 128 |
| 142 | TR0084 | R         | R         | 128 | 128 |
| 143 | TR0085 | R         | R         | 64  | 64  |
| 144 | TR0086 | R         | R         | 128 | 128 |
| 145 | TR0087 | R         | R         | 128 | 128 |
| 146 | TR0088 | R         | R         | 128 | 128 |
| 147 | TR0089 | R         | R         | 128 | 128 |
| 148 | TR0090 | R         | R         | 128 | 128 |
| 149 | TR0091 | R         | R         | 128 | 256 |
| 150 | TR0092 | R         | R         | 128 | 128 |
| 151 | TR0093 | R         | R         | 256 | 256 |
| 152 | TR0094 | R         | R         | 128 | 128 |
| 153 | TR0095 | R         | R         | 128 | 128 |
| 154 | TR0096 | S (24.65) | S (22.30) | 512 | 512 |
| 155 | TR0097 | R         | R         | 128 | 128 |
| 156 | TR0098 | R         | R         | 128 | 128 |
| 157 | TR099  | R         | R         | 128 | 128 |
| 158 | TR100  | R         | R         | 128 | 128 |
| 159 | TR0101 | R         | R         | 128 | 128 |
| 160 | TR0102 | R         | R         | 128 | 128 |
| 161 | TR0103 | S (24.25) | S (28.55) | 128 | 128 |
| 162 | TR0104 | R         | R         | 256 | 256 |
| 163 | TR0105 | R         | R         | 256 | 256 |
| 164 | TR0106 | R         | R         | 128 | 128 |
| 165 | TR0107 | R         | R         | 128 | 128 |
| 166 | TR0108 | R         | R         | 64  | 64  |
| 167 | TR0109 | R         | R         | 128 | 128 |
| 168 | TR0110 | R         | R         | 128 | 128 |
| 169 | TR0111 | R         | R         | 64  | 64  |
| 170 | TR0112 | R         | R         | 128 | 128 |
| 171 | TR0113 | R         | R         | 128 | 128 |
| 172 | TR0114 | R         | R         | 128 | 128 |
| 173 | TR0115 | R         | R         | 128 | 256 |
| 174 | TR0116 | R         | R         | 128 | 256 |
| 175 | TR0117 | R         | R         | 512 | 512 |
| 176 | TR0118 | R         | R         | 128 | 128 |
| 177 | TR0119 | R         | R         | 128 | 128 |



|     |        |           |           |      |      |
|-----|--------|-----------|-----------|------|------|
| 178 | TR0120 | R         | R         | 256  | 256  |
| 179 | TR0121 | R         | R         | 256  | 128  |
| 180 | TR0122 | R         | R         | 1024 | 1024 |
| 181 | TR0123 | R         | R         | 128  | 128  |
| 182 | TR0124 | R         | R         | 128  | 128  |
| 183 | TR0125 | R         | R         | 128  | 128  |
| 184 | TR0126 | R         | R         | 128  | 128  |
| 185 | TR0127 | R         | R         | 128  | 128  |
| 186 | TR0128 | R         | R         | 256  | 256  |
| 187 | TR0129 | R (11.10) | R (10.40) | 256  | 256  |
| 188 | TR0130 | R         | R         | 128  | 128  |
| 189 | TR0131 | R         | R         | 128  | 128  |
| 190 | TR0132 | R         | R         | 128  | 128  |
| 191 | TR0133 | R         | R         | 128  | 128  |
| 192 | TR0134 | R         | R         | 128  | 128  |
| 193 | TR0135 | R         | R         | 128  | 128  |

---
